# Supplementary material
Source: PubMed Central journal article supplement (PMC3141963)
Supplement: 1108125108_pnas.201108125SI.pdf [file 1108125108_pnas.201108125SI.pdf]

# Supporting Information

Lee and Sancar 10.1073/pnas.1108125108

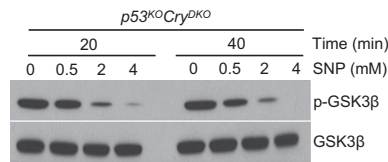

**Fig. S1.** SNP treatment results in decreased GSK3 $\beta$  phosphorylation in  $p53^{KO}Cry^{DKO}$  cells.  $p53^{KO}Cry^{DKO}$  cells were treated with 0, 0.5, 2, or 4 mM of SNP for the indicated time points. Cell lysates were subjected to immunoblotting using antibodies detecting GSK3 $\beta$  (Ser9) or GSK3 $\beta$ , respectively.

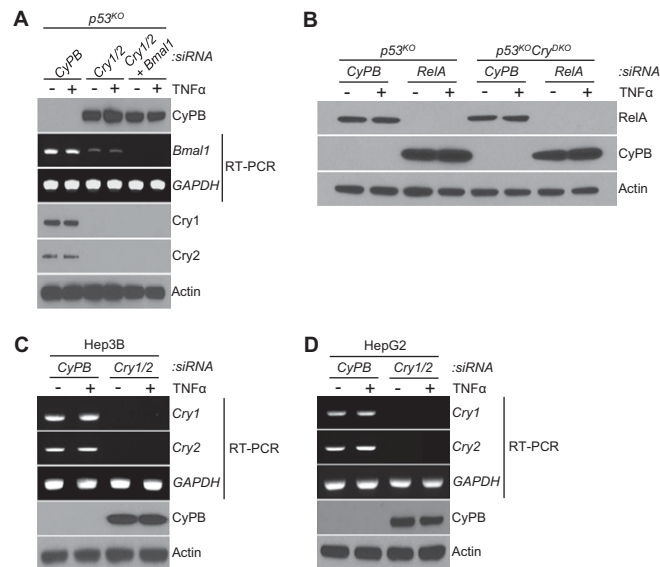

**Fig. S2.** Specificity and efficiency of siRNAs used to down-regulate apoptosis and clock genes. (A and B) Mouse cell lines. (C and D) Human cell lines. When available, antibodies were used to monitor down-regulation; otherwise, RT-PCT was used for the mRNAs of target genes.

**Table S1. Primer sequences**

| Name  |   | Sequences 5' to 3' (F, forward; R, reverse) | Species |
|-------|---|---------------------------------------------|---------|
| IAP2  | F | GCTCAGAATCAAAGGCCAAG                        | Mouse   |
|       | R | CACCAGGCTCCTACTGAAGC                        |         |
| ICAM1 | F | CGAAGGTGGTTCTTCTGAGC                        | Mouse   |
|       | R | GTCTGCTGAGACCCCTCTTG                        |         |
| BMAL1 | F | CGAAGACAATGAGCCAGACA                        | Mouse   |
|       | R | AAATAGCTGTCGCCCTCTGA                        |         |
| GAPDH | F | GGTGAAGGTCGGTGTGAACG                        | Mouse   |
|       | R | CTCGTCCTGGAAGATGGTG                         |         |
| IAP2  | F | ACTACATAGGACCTGGAGACAGAG                    | Human   |
|       | R | AAGTACTCACACCTTGAAACCAC                     |         |
| ICAM1 | F | CTGCAGACAGTGACCATC                          | Human   |
|       | R | GTCCAGTTTCCGGACAA                           |         |
| Cry1  | F | GGCGTTATTTGCCTGCCTA                         | Human   |
|       | R | ACGTTTCCCACTGAGAC                           |         |
| Cry2  | F | GTCCTGCAAGTCTTTCTTCC                        | Human   |
|       | R | CCACACAGGAAGGGACAGAT                        |         |
| GAPDH | F | ACAGTCAGCCGATCTTCTT                         | Human   |
|       | R | TTGATTTGGAGGGATCTCG                         |         |
